# Supplementary material
Source: publisher figshare collection journal article supplement (https://frontiersin.figshare.com/ndownloader/files/12471362)
Supplement: Supplementary file 1 [file 12471362]

## Sheet: Sheet1
Appendix 1 Supplemental Material. List of specimens used in genetic analyses of Scotophilus. Specimen details, localities, and GenBank accession numbers of sampled individuals of Scotophilus: CM — Carnegie Museum of Natural History, Pittsburgh; DM — Durban Natural Science Museum, Durban, South Africa; FMNH — Field Museum of Natural History, Chicago; IVB — Institute of Vertebrate Biology, Academy …
Taxon	Institution	Voucher No.	Country	Locality	cyt-b	ABHD11	ACOX2	ACPT	COPS7A	ROGDI	STAT5A	Latitude	Longitude
Scotophilus andrewreborii	CM	102254	Kenya	Kakamega	EU750970							0.216667	34.9167
Scotophilus andrewreborii	CM	98044	Kenya	Machakos	EU750965							-2.31667	38.1167
Scotophilus andrewreborii	CM	98045	Kenya	Machakos	EU750965							-2.31667	38.1167
Scotophilus andrewreborii	CM	98054	Kenya	Machakos	EU750965							-2.31667	38.1167
Scotophilus andrewreborii	TK	33395	Kenya	Machakos	EU750964							-2.31667	38.1167
Scotophilus andrewreborii	NMK	184195	Kenya	Marsabit	MH299498							2.32036	2.32036
Scotophilus andrewreborii	NMK	184199	Kenya	Marsabit	MH299499							2.32036	2.32036
Scotophilus andrewreborii	NMK	184200	Kenya	Marsabit	MH299500							2.32036	2.32036
Scotophilus andrewreborii	NMK	184201	Kenya	Marsabit	MH299501	MH299599	MH299630	MH299661	MH299692	MH299723	MH299754	2.32036	2.32036
Scotophilus andrewreborii	NMK	184202	Kenya	Marsabit	MH299502							2.32036	2.32036
Scotophilus andrewreborii	NMK	184310	Kenya	Marsabit	MH299503							2.23539	37.9267
Scotophilus andrewreborii	NMK	184311	Kenya	Marsabit	MH299504	MH299600	MH299631	MH299662	MH299693	MH299724	MH299755	2.23539	37.9267
Scotophilus andrewreborii	FMNH	220884	Kenya	Meru	MH299505							0.1648	38.2084
Scotophilus andrewreborii	CM	98050	Kenya	Nakuru	EU750970							-0.316667	36.05
Scotophilus andrewreborii	FMNH	216785	Kenya	Nakuru	MH299506							-0.74192	36.4325
Scotophilus andrewreborii	FMNH	216786	Kenya	Nakuru	MH299507							-0.74192	36.4325
Scotophilus andrewreborii	FMNH	216787	Kenya	Nakuru	MH299508							-0.74192	36.4325
Scotophilus andrewreborii	FMNH	216789	Kenya	Nakuru	MH299509							-0.74192	36.4325
Scotophilus andrewreborii	FMNH	216790	Kenya	Nakuru	MH299510							-0.74192	36.4325
Scotophilus andrewreborii	FMNH	225785	Kenya	Nakuru	MH299511							-0.39227	36.2112
Scotophilus andrewreborii	FMNH	225787	Kenya	Nakuru	MH299512							-0.40276	36.239
Scotophilus andrewreborii	FMNH	225790	Kenya	Nakuru	MH299513	MH299601	MH299632	MH299663	MH299694	MH299725	MH299756	-0.40276	36.239
Scotophilus andrewreborii	FMNH	225791	Kenya	Nakuru	MH299514							-0.40276	36.239
Scotophilus andrewreborii	FMNH	225798	Kenya	Nakuru	MH299515							-0.39227	36.2112
Scotophilus andrewreborii	FMNH	225800	Kenya	Nakuru	MH299516							-0.39227	36.2112
Scotophilus andrewreborii	FMNH	225808	Kenya	Nakuru	MH299517							-0.39219	36.2418
Scotophilus andrewreborii	FMNH	225809	Kenya	Nakuru	MH299518							-0.39219	36.2418
Scotophilus andrewreborii	TTU	TK33141	Kenya	Nakuru	EU750970							-0.29	36.07
Scotophilus andrewreborii	TTU	TK33142	Kenya	Nakuru	EU750969							-0.29	36.07
Scotophilus andrewreborii	FMNH	225597	Kenya	Nyandarua	MH299519							-0.074192	36.4325
Scotophilus andrewreborii	FMNH	225598	Kenya	Nyandarua	MH299520	MH299602	MH299633	MH299664	MH299695	MH299726	MH299757	-0.074192	36.4325
Scotophilus andrewreborii	FMNH	225599	Kenya	Nyandarua	MH299521							-0.074192	36.4325
Scotophilus andrewreborii	FMNH	225601	Kenya	Nyandarua	MH299522							-0.074192	36.4325
Scotophilus andrewreborii	FMNH	225602	Kenya	Nyandarua	MH299523							-0.074192	36.4325
Scotophilus andrewreborii	FMNH	225603	Kenya	Nyandarua	MH299524							-0.074192	36.4325
Scotophilus andrewreborii	FMNH	216151	Kenya	Taita Taveta	MH299525	MH299603	MH299634	MH299665	MH299696	MH299727	MH299758	-2.75443	38.1149
Scotophilus andrewreborii	FMNH	216152	Kenya	Taita Taveta	MH299526	MH299604	MH299635	MH299666	MH299697	MH299728	MH299759	-2.75443	38.1149
Scotophilus andrewreborii	MCZ	60092	Kenya	Taita Taveta	EU750966							-3.39632	37.6736
Scotophilus andrewreborii	CM	102246	Kenya	West Pokot	EU750967							1.5	35.4667
Scotophilus andrewreborii	CM	102247	Kenya	West Pokot	EU750968							1.5	35.4667
Scotophilus andrewreborii	CM	102249	Kenya	West Pokot	EU750966							1.48333	35.4833
Scotophilus cf. clade 3	none	DSJZM57	Zambia	Choma	AY754073							-16.81	26.98
Scotophilus cf. clade 3	TM	47505	Zambia	Kafue Flats	AY754071							-15.7338	27.4837
Scotophilus cf. clade 3	TM	47506	Zambia	Kafue Flats	AY754072							-15.7338	27.4837
Scotophilus cf. clade 3	TM	47508	Zambia	Kafue Flats	AY754070							-15.7338	27.4837
Scotophilus cf. clade 5	none	DSJZM72	Zambia	Choma	AY754067							-16.81	26.98
Scotophilus cf. clade 5	none	DSJZM86	Zambia	Kitwe	AY754068							-12.81	28.21
Scotophilus cf. clade 5	none	DSJZM16	Zambia	Lusaka	AY754065							-15.41	28.33
Scotophilus cf. ejetai	TCWC	57927	Ethiopia	Oroniya	EU750960							8.36194	35.8839
Scotophilus cf. ejetai	MCZ	60091	Kenya	West Pokot	EU750959							1.48452	35.4717
Scotophilus clade 1	FMNH	216120	Kenya	Kilifi	MH299528							-3.30002	39.9951
Scotophilus clade 1	FMNH	216121	Kenya	Kilifi	MH299529	MH299605	MH299636	MH299667	MH299698	MH299729	MH299760	-3.3091	40.0176
Scotophilus clade 1	FMNH	216122	Kenya	Kilifi	MH299530							-3.30002	39.9951
Scotophilus clade 1	FMNH	216123	Kenya	Kilifi	MH299531							-3.30002	39.9951
Scotophilus clade 1	FMNH	216124	Kenya	Kilifi	MH299532							-3.30002	39.9951
Scotophilus clade 1	FMNH	216134	Kenya	Kilifi	MH299533							-3.30002	39.9951
Scotophilus clade 1	FMNH	216140	Kenya	Kilifi	MH299534							-3.2157	39.9247
Scotophilus clade 1	FMNH	216141	Kenya	Kilifi	MH299535							-3.2157	39.9247
Scotophilus clade 1	FMNH	216142	Kenya	Kilifi	MH299536							-3.2157	39.9247
Scotophilus clade 1	FMNH	216143	Kenya	Kilifi	MH299537							-3.2157	39.9247
Scotophilus clade 1	FMNH	220495	Kenya	Kilifi	MH299538							-3.29986	39.9951
Scotophilus clade 1	FMNH	220496	Kenya	Kilifi	MH299539							-3.29986	39.9951
Scotophilus clade 1	FMNH	220497	Kenya	Kilifi	MH299540							-3.29986	39.9951
Scotophilus clade 1	FMNH	220498	Kenya	Kilifi	MH299541							-3.29986	39.9951
Scotophilus clade 1	NMK	187245	Kenya	Kilifi	MH299527							-3.33452	40.0307
Scotophilus clade 1	CM	98043	Kenya	Kwale	EU750963							-4.25	39.3833
Scotophilus clade 1	FMNH	216137	Kenya	Malindi	MH299542							-3.30325	39.9989
Scotophilus clade 1	FMNH	216138	Kenya	Malindi	MH299543							-3.30325	39.9989
Scotophilus clade 1	FMNH	216139	Kenya	Malindi	MH299544							-3.30325	39.9989
Scotophilus clade 1	FMNH	216144	Kenya	Malindi	MH299545							-3.25463	39.9247
Scotophilus clade 1	FMNH	216145	Kenya	Malindi	MH299546							-3.25463	39.9247
Scotophilus clade 1	FMNH	216146	Kenya	Malindi	MH299547							-3.25463	39.9247
Scotophilus clade 1	FMNH	216147	Kenya	Malindi	MH299548	MH299606	MH299637	MH299668	MH299699	MH299730	MH299761	-3.25463	39.9247
Scotophilus clade 1	FMNH	216148	Kenya	Malindi	MH299549	MH299607	MH299638	MH299669	MH299700	MH299731	MH299762	-3.25463	39.9247
Scotophilus clade 2	NMK	184405	Kenya	Laikipia	MH299550	MH299608	MH299639	MH299670	MH299701	MH299732	MH299763	0.30823	37.1525
Scotophilus clade 2	NMK	184427	Kenya	Laikipia	MH299551							0.22832	37.113
Scotophilus clade 2	NMK	184433	Kenya	Laikipia	MH299552							0.22941	37.1101
Scotophilus clade 2	NMK	184479	Kenya	Laikipia	MH299553							0.21774	37.1194
Scotophilus clade 2	NMK	184482	Kenya	Laikipia	MH299554							0.21774	37.1194
Scotophilus clade 2	NMK	184488	Kenya	Laikipia	MH299555							0.20382	37.1047
Scotophilus clade 2	NMK	184566	Kenya	Laikipia	MH299556							0.17191	37.1475
Scotophilus clade 2	NMK	184572	Kenya	Laikipia	MH299557							0.16963	37.1625
Scotophilus clade 2	NMK	184576	Kenya	Laikipia	MH299558							0.16951	37.1626
Scotophilus clade 2	NMK	184584	Kenya	Laikipia	MH299559							0.18306	37.1457
Scotophilus clade 2	NMK	184594	Kenya	Laikipia	MH299560	MH299609	MH299640	MH299671	MH299702	MH299733	MH299764	0.18764	37.0825
Scotophilus clade 2	NMK	184606	Kenya	Laikipia	MH299561							0.14391	37.1145
Scotophilus clade 2	NMK	184609	Kenya	Laikipia	MH299562							-0.01548	37.091
Scotophilus clade 2	NMK	184612	Kenya	Laikipia	MH299563							-0.01548	37.091
Scotophilus clade 2	NMK	184613	Kenya	Laikipia	MH299564							-0.01548	37.091
Scotophilus clade 2	NMK	184626	Kenya	Laikipia	MH299565							-0.01548	37.091
Scotophilus clade 2	FMNH	220883	Kenya	Meru	MH299566							0.1648	38.2084
Scotophilus clade 2	FMNH	220887	Kenya	Meru	MH299567							0.169683	38.1942
Scotophilus clade 2	FMNH	225799	Kenya	Nakuru	MH299568	MH299610	MH299641	MH299672	MH299703	MH299734	MH299765	-0.39227	36.2112
Scotophilus clade 2	CM	102244	Kenya	Taita Taveta	EU750961							-3.41667	37.65
Scotophilus clade 2	CM	102245	Kenya	Taita Taveta	EU750962							-3.41667	37.65
Scotophilus clade 2	MCZ	60093	Kenya	Taita Taveta	EU750961							-3.39632	37.6736
Scotophilus clade 2	CM	102248	Kenya	West Pokot	EU750961							1.48333	35.4833
Scotophilus clade 3	FMNH	211513	Malawi	Rumphi	MH299569	MH299611	MH299642	MH299673	MH299704	MH299735	MH299766	-10.8788	33.4627
Scotophilus clade 3	FMNH	228967	Mozambique	Inhambane	MH299570	MH299612	MH299643	MH299674	MH299705	MH299736	MH299767	-21.671	35.188
Scotophilus clade 3	TM	47504	S Africa	Kruger NP	AY754069							-23.98	31.57
Scotophilus clade 3	FMNH	195620	S Africa	Mpumalanga	MH299571	MH299613	MH299644	MH299675	MH299706	MH299737	MH299768	-25.5628	31.8507
Scotophilus clade 4	FMNH	221038	Kenya	Kajiado	MH299572							-2.6789	37.2666
Scotophilus clade 4	FMNH	221039	Kenya	Kajiado	MH299573							-2.6789	37.2666
Scotophilus clade 4	FMNH	221040	Kenya	Kajiado	MH299574							-2.6789	37.2666
Scotophilus clade 4	FMNH	221041	Kenya	Kajiado	MH299575							-2.6789	37.2666
Scotophilus clade 4	FMNH	221043	Kenya	Kajiado	MH299576	MH299614	MH299645	MH299676	MH299707	MH299738	MH299769	-2.6789	37.2666
Scotophilus clade 4	FMNH	221042	Kenya	Makueni	MH299577	MH299615	MH299646	MH299677	MH299708	MH299739	MH299770	-2.20307	37.7137
Scotophilus clade 4	FMNH	225604	Kenya	Narok	MH299578	MH299616	MH299647	MH299678	MH299709	MH299740	MH299771	-1.54665	35.3056
Scotophilus clade 4	FMNH	225605	Kenya	Narok	MH299579							-1.40065	35.0183
Scotophilus clade 4	FMNH	225606	Kenya	Narok	MH299580							-1.40065	35.0183
Scotophilus clade 4	FMNH	225607	Kenya	Narok	MH299581							-1.39654	34.9941
Scotophilus clade 4	FMNH	225608	Kenya	Narok	MH299582							-1.39654	34.9941
Scotophilus clade 4	FMNH	225609	Kenya	Narok	MH299583							-1.39654	34.9941
Scotophilus clade 4	FMNH	225610	Kenya	Narok	MH299584							-1.54651	35.3057
Scotophilus clade 5	FMNH	228966	Mozambique	Inhambane	MH299585	MH299617	MH299648	MH299679	MH299710	MH299741	MH299772	-21.671	35.188
Scotophilus clade 5	TM	46657	S Africa	Gauteng	AY754061
Scotophilus clade 5	TM	46906	S Africa	Gauteng	AY754062
Scotophilus clade 5	none	P84	S Africa	Kranzkloof NR	AY754063							-29.77	30.83
Scotophilus clade 5	none	DSJKP11	S Africa	Kruger NP	AY754064
Scotophilus clade 5	ROM	119955	S Africa	KrugerNP	EU750995							-22.3786	31.2117
Scotophilus clade 5	none	WW2004/01	S Africa	KwaZulu Natal	AY754059
Scotophilus clade 5	TM	39624	S Africa	KwaZulu Natal	EU750997
Scotophilus clade 5	TM	39625	S Africa	Mpumalanga	EU750997
Scotophilus clade 5	CM	105747	S Africa	Transvaal	EU750999							-22.2167	29.3667
Scotophilus clade 5	CM	105748	S Africa	Transvaal	EU750993							-22.2167	29.3667
Scotophilus clade 5	CM	105749	S Africa	Transvaal	EU750992							-22.2167	29.3667
Scotophilus clade 5	CM	105750	S Africa	Transvaal	EU750998							-22.2167	29.3667
Scotophilus clade 5	TM	37668	S Africa	Transvaal	EU750994
Scotophilus clade 5	TM	37669	S Africa	Transvaal	EU750996
Scotophilus clade 5	TM	47501	Zambia	Choma	AY754066							-16.81	26.98
Scotophilus clade 6	ROM	119944	S Africa	Kruger NP	EU750949							-22.4306	31.2106
Scotophilus clade 6	TM	38149	S Africa	Kruger NP	EU750950
Scotophilus clade 6	TM	39481	S Africa	Northern	EU750951
Scotophilus clade 6	TM	39482	S Africa	Northern	EU750951
Scotophilus clade 6	TM	37675	S Africa	Transval	EU750952
Scotophilus clade 6	TM	37691	S Africa	Transval	EU750953
Scotophilus clade 6	TM	47503	Zambia		AY754075
Scotophilus clade 7	FMNH	215611	Kenya	Kisumu	MH299587	MH299618	MH299649	MH299680	MH299711	MH299742	MH299773	-0.10961	34.7459
Scotophilus clade 7	FMNH	215612	Kenya	Kisumu	MH299588	MH299619	MH299650	MH299681	MH299712	MH299743	MH299774	-0.10961	34.7459
Scotophilus clade 7	NMK	184946	Kenya	Kisumu	MH299586	MH299620	MH299651	MH299682	MH299713	MH299744	MH299775	-0.10943	34.7461
Scotophilus ejetai	CM	114043	Ethiopia	Gondar, Debre Tabor	EU750954							11.9167	37.9167
Scotophilus ejetai	TCWC	57954	Ethiopia	Oroniya	EU750956							8.36194	35.8839
Scotophilus ejetai	TCWC	57970	Ethiopia	Oroniya	EU750956							8.36194	35.8839
Scotophilus ejetai	TCWC	57956	Ethiopia	Oroniya	EU750956							8.36194	35.8839
Scotophilus ejetai	CM	DAS10293	Ethiopia	Oroniya, Dogy River Bridge	EU750956							8.36194	35.8839
Scotophilus ejetai	CM	DAS10300	Ethiopia	Oroniya, Dogy River Bridge	EU750958							8.36194	35.8839
Scotophilus ejetai	CM	DAS10309	Ethiopia	Oroniya, Dogy River Bridge	EU750956							8.36194	35.8839
Scotophilus ejetai	CM	DAS10329	Ethiopia	Oroniya, Dogy River Bridge	EU750957							8.36194	35.8839
Scotophilus ejetai	NMP	pb2554	Ethiopia		HQ694507
Scotophilus ejetai	NMP	pb2557	Ethiopia		HQ694508
Scotophilus ejetai	NMP	pb2596	Ethiopia		HQ694509
Scotophilus ejetai	CM	102256	Kenya	Taita Taveta	EU750955							-3.38333	37.7
Scotophilus ejetai	NMP	pb3065	Yemen		HQ694502
Scotophilus heathii	MVZ	176513	China	Yunnan	EU750946							21.9167	101.267
Scotophilus heathii	ROM	107786	Vietnam	Dak Lak	EU750944							12.8667	107.7
Scotophilus heathii	MVZ	186416	Vietnam	Vinh Phuc	EU750945							21.4539	105.642
Scotophilus kuhlii	none	AK 21477	Malaysia	Kedah	EU750916
Scotophilus kuhlii	USNM	458706	Philippines	Negros Oriental	EU750914							9.05	123.05
Scotophilus kuhlii	MVZ	186418	Vietnam	Tam Dao	EU750913							21.4539	105.642
Scotophilus leucogaster	NMP	pb3526	Benin		JX281748
Scotophilus leucogaster	CM	113645	Ghana	Northern	EU750940							9.41667	-0.066667
Scotophilus leucogaster	NMP	pb4782	Mauritania		JX281747
Scotophilus leucogaster	NMP	pb4787	Mauritania		JX281736
Scotophilus leucogaster	IVB	sen0382	Senegal		JX281735
Scotophilus leucogaster	IVB	sen0523	Senegal		JX281744
Scotophilus leucogaster	IVB	sen1271	Senegal		JX281745
Scotophilus leucogaster	IVB	sen1579	Senegal		JX281746
Scotophilus leucogaster	NMP	pb3599	Yemen		HQ694503
Scotophilus leucogaster	NMP	pb3676	Yemen		HQ694504
Scotophilus leucogaster	NMP	pb3677	Yemen		HQ694505
Scotophilus leucogaster	NMP	pb3725	Yemen		HQ694506
Scotophilus livingstonii	CM	113641	Ghana	Greater Accra	EU750977							5.66667	-0.2
Scotophilus livingstonii	CM	113642	Ghana	Greater Accra	EU750978							5.66667	-0.2
Scotophilus livingstonii	CM	113643	Ghana	Greater Accra	EU750979							5.66667	-0.2
Scotophilus livingstonii	CM	98051	Kenya	Kakamega	EU750984							-0.216667	34.9167
Scotophilus livingstonii	CM	98052	Kenya	Kakamega	EU750981							0.216667	34.9167
Scotophilus livingstonii	CM	98053	Kenya	Kakamega	EU750983							-0.216667	34.9167
Scotophilus livingstonii	CM	102251	Kenya	Kakamega	EU750985							0.233333	34.9
Scotophilus livingstonii	CM	102252	Kenya	Kakamega	EU750982							0.216667	34.9167
Scotophilus livingstonii	CM	102253	Kenya	Kakamega	EU750980							0.216667	34.9167
Scotophilus livingstonii	CM	102255	Kenya	Kakamega	EU750981							0.216667	34.9167
Scotophilus livingstonii	MCZ	60089	Kenya	Kakamega	EU750981							0.197826	34.9021
Scotophilus livingstonii	NMK	184974	Kenya	Kakamega	MH299589	MH299621	MH299652	MH299683	MH299714	MH299745	MH299776	0.39584	34.8831
Scotophilus livingstonii	NMK	187406	Kenya	Kakamega	MH299590	MH299622	MH299653	MH299684	MH299715	MH299746	MH299777	0.34375	34.8566
Scotophilus livingstonii	CM	98048	Kenya	Nakuru	EU750981							-0.4	36.1167
Scotophilus marovaza	FMNH	184050	Madagascar		EU750943	MH299623	MH299654	MH299685	MH299716	MH299747	MH299778	-14.9467	47.2746
Scotophilus marovaza	FMNH	184085	Madagascar		EU750942	MH299624	MH299655	MH299686	MH299717	MH299748	MH299779	-14.9467	47.2746
Scotophilus nigrita	NMP	91889	Benin		KF305856
Scotophilus nigrita	CM	9873	S Africa	Mpumalanga	KF305857
Scotophilus nigrita	IVB	sen1967	Senegal		KF305855
Scotophilus nigritellus	NMP	pb3530	Benin		JX281743
Scotophilus nigritellus	CM	113644	Ghana	Greater Accra	EU750971							5.88333	0.05
Scotophilus nigritellus	CM	113647	Ghana	Greater Accra	EU750974							5.95	0.066667
Scotophilus nigritellus	CM	113648	Ghana	Greater Accra	EU750975							5.95	0.066667
Scotophilus nigritellus	CM	113650	Ghana	Greater Accra	EU750972							5.95	0.066667
Scotophilus nigritellus	CM	113651	Ghana	Greater Accra	EU750973							5.88333	0.05
Scotophilus nigritellus	CM	113652	Ghana	Greater Accra	EU750976							5.88333	0.05
Scotophilus nigritellus	IVB	sen0524	Senegal		JX281737
Scotophilus nigritellus	IVB	sen1236	Senegal		JX281738
Scotophilus nigritellus	IVB	sen1264	Senegal		JX281739
Scotophilus nigritellus	IVB	sen1333	Senegal		JX281740
Scotophilus nigritellus	IVB	sen1685	Senegal		JX281741
Scotophilus nigritellus	IVB	sen1759	Senegal		JX281742
Scotophilus nucella	ZFMK	2003.1	Ghana	Krokosua Hills	KX010977							6.61667	2.85
Scotophilus nucella	NMP	95434	Ghana		KX010978
Scotophilus nucella	none	KHFR-C5	Ghana		KX010980
Scotophilus nucella	none	KHFR-C6	Ghana		KX010979
Scotophilus nux	CM	108032	Cameroon	Southwest	EU750935							5	8.86667
Scotophilus nux	CM	108033	Cameroon	Southwest	EU750933							5	8.86667
Scotophilus nux	CM	108034	Cameroon	Southwest	EU750934							5	8.86667
Scotophilus nux	CM	108035	Cameroon	Southwest	EU750932							5.26667	9.21667
Scotophilus nux	none	KHFR-B7	Ghana		KX010976
Scotophilus nux	CM	102257	Kenya	Kakamega	EU750936							0.233333	34.9
Scotophilus nux	CM	102258	Kenya	Kakamega	EU750939							0.233333	34.9
Scotophilus nux	CM	102259	Kenya	Kakamega	EU750937							0.233333	34.9
Scotophilus nux	MCZ	59891	Kenya	Kakamega	EU750938							0.283333	34.7833
Scotophilus robustus	FMNH	151939	Madagascar		EU750948							-22.85	44.7167
Scotophilus robustus	FMNH	166186	Madagascar		EU750947	MH299625	MH299656	MH299687	MH299718	MH299749	MH299780	-19.7067	47.835
Scotophilus tandrefana	UADBA	46923	Madagascar	Mahajanga	EU750941							-19.1409	44.8122
Scotophilus trujilloi	FMNH	216153	Kenya	Kilifi	MH299592	MH299626	MH299657	MH299688	MH299719	MH299750	MH299781	-3.30002	39.9951
Scotophilus trujilloi	FMNH	216154	Kenya	Kilifi	MH299593	MH299627	MH299658	MH299689	MH299720	MH299751	MH299782	-3.3091	40.0176
Scotophilus trujilloi	FMNH	216155	Kenya	Kilifi	MH299594							-3.30002	39.9951
Scotophilus trujilloi	FMNH	216156	Kenya	Kilifi	MH299595	MH299628	MH299659	MH299690	MH299721	MH299752	MH299783	-3.2157	39.9247
Scotophilus trujilloi	FMNH	216157	Kenya	Kilifi	MH299596							-3.2157	39.9247
Scotophilus trujilloi	FMNH	216158	Kenya	Kilifi	MH299597							-3.2157	39.9247
Scotophilus trujilloi	CM	98039	Kenya	Kwale	EU750989							-4.3	39.5833
Scotophilus trujilloi	CM	98040	Kenya	Kwale	EU750986							-4.3	39.5833
Scotophilus trujilloi	MCZ	59888	Kenya	Kwale	EU750988							-4.3	39.5833
Scotophilus trujilloi	CM	102241	Kenya	Taita Taveta	EU750987							-3.38333	37.7
Scotophilus trujilloi	CM	102242	Kenya	Taita Taveta	EU750990							-3.38333	37.7
Scotophilus trujilloi	CM	102243	Kenya	Taita Taveta	EU750991							-3.38333	37.7
Scotophilus trujilloi	FMNH	192903	Tanzania	Pemba Island	MH299598	MH299629	MH299660	MH299691	MH299722	MH299753	MH299784	-4.94176	39.7103
Myotis tricolor	FMNH	225823	Kenya	Nakuru	MH299591							-0.25157	36.0548

## Sheet: Sheet2
Scotophilus andrewreborii	CM	102254	Kenya	Kakamega	EU750970							0.216667	34.9167
Scotophilus andrewreborii	CM	98044	Kenya	Machakos	EU750965							-2.31667	38.1167
Scotophilus andrewreborii	CM	98045	Kenya	Machakos	EU750965							-2.31667	38.1167
Scotophilus andrewreborii	CM	98054	Kenya	Machakos	EU750965							-2.31667	38.1167
Scotophilus andrewreborii	TK	33395	Kenya	Machakos	EU750964							-2.31667	38.1167
Scotophilus andrewreborii	NMK	184195	Kenya	Marsabit	MH299498							2.32036	2.32036
Scotophilus andrewreborii	NMK	184199	Kenya	Marsabit	MH299499							2.32036	2.32036
Scotophilus andrewreborii	NMK	184200	Kenya	Marsabit	MH299500							2.32036	2.32036
Scotophilus andrewreborii	NMK	184201	Kenya	Marsabit	MH299501	MH299599	MH299630	MH299661	MH299692	MH299723	MH299754	2.32036	2.32036
Scotophilus andrewreborii	NMK	184202	Kenya	Marsabit	MH299502							2.32036	2.32036
Scotophilus andrewreborii	NMK	184310	Kenya	Marsabit	MH299503							2.23539	37.9267
Scotophilus andrewreborii	NMK	184311	Kenya	Marsabit	MH299504	MH299600	MH299631	MH299662	MH299693	MH299724	MH299755	2.23539	37.9267
Scotophilus andrewreborii	FMNH	220884	Kenya	Meru	MH299505							0.1648	38.2084
Scotophilus andrewreborii	CM	98050	Kenya	Nakuru	EU750970							-0.316667	36.05
Scotophilus andrewreborii	FMNH	216785	Kenya	Nakuru	MH299506							-0.74192	36.4325
Scotophilus andrewreborii	FMNH	216786	Kenya	Nakuru	MH299507							-0.74192	36.4325
Scotophilus andrewreborii	FMNH	216787	Kenya	Nakuru	MH299508							-0.74192	36.4325
Scotophilus andrewreborii	FMNH	216789	Kenya	Nakuru	MH299509							-0.74192	36.4325
Scotophilus andrewreborii	FMNH	216790	Kenya	Nakuru	MH299510							-0.74192	36.4325
Scotophilus andrewreborii	FMNH	225785	Kenya	Nakuru	MH299511							-0.39227	36.2112
Scotophilus andrewreborii	FMNH	225787	Kenya	Nakuru	MH299512							-0.40276	36.239
Scotophilus andrewreborii	FMNH	225790	Kenya	Nakuru	MH299513	MH299601	MH299632	MH299663	MH299694	MH299725	MH299756	-0.40276	36.239
Scotophilus andrewreborii	FMNH	225791	Kenya	Nakuru	MH299514							-0.40276	36.239
Scotophilus andrewreborii	FMNH	225798	Kenya	Nakuru	MH299515							-0.39227	36.2112
Scotophilus andrewreborii	FMNH	225800	Kenya	Nakuru	MH299516							-0.39227	36.2112
Scotophilus andrewreborii	FMNH	225808	Kenya	Nakuru	MH299517							-0.39219	36.2418
Scotophilus andrewreborii	FMNH	225809	Kenya	Nakuru	MH299518							-0.39219	36.2418
Scotophilus andrewreborii	TTU	TK33141	Kenya	Nakuru	EU750970							-0.29	36.07
Scotophilus andrewreborii	TTU	TK33142	Kenya	Nakuru	EU750969							-0.29	36.07
Scotophilus andrewreborii	FMNH	225597	Kenya	Nyandarua	MH299519							-0.074192	36.4325
Scotophilus andrewreborii	FMNH	225598	Kenya	Nyandarua	MH299520	MH299602	MH299633	MH299664	MH299695	MH299726	MH299757	-0.074192	36.4325
Scotophilus andrewreborii	FMNH	225599	Kenya	Nyandarua	MH299521							-0.074192	36.4325
Scotophilus andrewreborii	FMNH	225601	Kenya	Nyandarua	MH299522							-0.074192	36.4325
Scotophilus andrewreborii	FMNH	225602	Kenya	Nyandarua	MH299523							-0.074192	36.4325
Scotophilus andrewreborii	FMNH	225603	Kenya	Nyandarua	MH299524							-0.074192	36.4325
Scotophilus andrewreborii	FMNH	216151	Kenya	Taita Taveta	MH299525	MH299603	MH299634	MH299665	MH299696	MH299727	MH299758	-2.75443	38.1149
Scotophilus andrewreborii	FMNH	216152	Kenya	Taita Taveta	MH299526	MH299604	MH299635	MH299666	MH299697	MH299728	MH299759	-2.75443	38.1149
Scotophilus andrewreborii	MCZ	60092	Kenya	Taita Taveta	EU750966							-3.39632	37.6736
Scotophilus andrewreborii	CM	102246	Kenya	West Pokot	EU750967							1.5	35.4667
Scotophilus andrewreborii	CM	102247	Kenya	West Pokot	EU750968							1.5	35.4667
Scotophilus andrewreborii	CM	102249	Kenya	West Pokot	EU750966							1.48333	35.4833
Scotophilus cf. clade 3	none	DSJZM57	Zambia	Choma	AY754073							-16.81	26.98
Scotophilus cf. clade 3	TM	47505	Zambia	Kafue Flats	AY754071							-15.7338	27.4837
Scotophilus cf. clade 3	TM	47506	Zambia	Kafue Flats	AY754072							-15.7338	27.4837
Scotophilus cf. clade 3	TM	47508	Zambia	Kafue Flats	AY754070							-15.7338	27.4837
Scotophilus cf. clade 5	none	DSJZM72	Zambia	Choma	AY754067							-16.81	26.98
Scotophilus cf. clade 5	none	DSJZM86	Zambia	Kitwe	AY754068							-12.81	28.21
Scotophilus cf. clade 5	none	DSJZM16	Zambia	Lusaka	AY754065							-15.41	28.33
Scotophilus cf. ejetai	TCWC	57927	Ethiopia	Oroniya	EU750960							8.36194	35.8839
Scotophilus cf. ejetai	MCZ	60091	Kenya	West Pokot	EU750959							1.48452	35.4717
Scotophilus clade 1	FMNH	216120	Kenya	Kilifi	MH299528							-3.30002	39.9951
Scotophilus clade 1	FMNH	216121	Kenya	Kilifi	MH299529	MH299605	MH299636	MH299667	MH299698	MH299729	MH299760	-3.3091	40.0176
Scotophilus clade 1	FMNH	216122	Kenya	Kilifi	MH299530							-3.30002	39.9951
Scotophilus clade 1	FMNH	216123	Kenya	Kilifi	MH299531							-3.30002	39.9951
Scotophilus clade 1	FMNH	216124	Kenya	Kilifi	MH299532							-3.30002	39.9951
Scotophilus clade 1	FMNH	216134	Kenya	Kilifi	MH299533							-3.30002	39.9951
Scotophilus clade 1	FMNH	216140	Kenya	Kilifi	MH299534							-3.2157	39.9247
Scotophilus clade 1	FMNH	216141	Kenya	Kilifi	MH299535							-3.2157	39.9247
Scotophilus clade 1	FMNH	216142	Kenya	Kilifi	MH299536							-3.2157	39.9247
Scotophilus clade 1	FMNH	216143	Kenya	Kilifi	MH299537							-3.2157	39.9247
Scotophilus clade 1	FMNH	220495	Kenya	Kilifi	MH299538							-3.29986	39.9951
Scotophilus clade 1	FMNH	220496	Kenya	Kilifi	MH299539							-3.29986	39.9951
Scotophilus clade 1	FMNH	220497	Kenya	Kilifi	MH299540							-3.29986	39.9951
Scotophilus clade 1	FMNH	220498	Kenya	Kilifi	MH299541							-3.29986	39.9951
Scotophilus clade 1	NMK	187245	Kenya	Kilifi	MH299527							-3.33452	40.0307
Scotophilus clade 1	CM	98043	Kenya	Kwale	EU750963							-4.25	39.3833
Scotophilus clade 1	FMNH	216137	Kenya	Malindi	MH299542							-3.30325	39.9989
Scotophilus clade 1	FMNH	216138	Kenya	Malindi	MH299543							-3.30325	39.9989
Scotophilus clade 1	FMNH	216139	Kenya	Malindi	MH299544							-3.30325	39.9989
Scotophilus clade 1	FMNH	216144	Kenya	Malindi	MH299545							-3.25463	39.9247
Scotophilus clade 1	FMNH	216145	Kenya	Malindi	MH299546							-3.25463	39.9247
Scotophilus clade 1	FMNH	216146	Kenya	Malindi	MH299547							-3.25463	39.9247
Scotophilus clade 1	FMNH	216147	Kenya	Malindi	MH299548	MH299606	MH299637	MH299668	MH299699	MH299730	MH299761	-3.25463	39.9247
Scotophilus clade 1	FMNH	216148	Kenya	Malindi	MH299549	MH299607	MH299638	MH299669	MH299700	MH299731	MH299762	-3.25463	39.9247
Scotophilus clade 2	NMK	184405	Kenya	Laikipia	MH299550	MH299608	MH299639	MH299670	MH299701	MH299732	MH299763	0.30823	37.1525
Scotophilus clade 2	NMK	184427	Kenya	Laikipia	MH299551							0.22832	37.113
Scotophilus clade 2	NMK	184433	Kenya	Laikipia	MH299552							0.22941	37.1101
Scotophilus clade 2	NMK	184479	Kenya	Laikipia	MH299553							0.21774	37.1194
Scotophilus clade 2	NMK	184482	Kenya	Laikipia	MH299554							0.21774	37.1194
Scotophilus clade 2	NMK	184488	Kenya	Laikipia	MH299555							0.20382	37.1047
Scotophilus clade 2	NMK	184566	Kenya	Laikipia	MH299556							0.17191	37.1475
Scotophilus clade 2	NMK	184572	Kenya	Laikipia	MH299557							0.16963	37.1625
Scotophilus clade 2	NMK	184576	Kenya	Laikipia	MH299558							0.16951	37.1626
Scotophilus clade 2	NMK	184584	Kenya	Laikipia	MH299559							0.18306	37.1457
Scotophilus clade 2	NMK	184594	Kenya	Laikipia	MH299560	MH299609	MH299640	MH299671	MH299702	MH299733	MH299764	0.18764	37.0825
Scotophilus clade 2	NMK	184606	Kenya	Laikipia	MH299561							0.14391	37.1145
Scotophilus clade 2	NMK	184609	Kenya	Laikipia	MH299562							-0.01548	37.091
Scotophilus clade 2	NMK	184612	Kenya	Laikipia	MH299563							-0.01548	37.091
Scotophilus clade 2	NMK	184613	Kenya	Laikipia	MH299564							-0.01548	37.091
Scotophilus clade 2	NMK	184626	Kenya	Laikipia	MH299565							-0.01548	37.091
Scotophilus clade 2	FMNH	220883	Kenya	Meru	MH299566							0.1648	38.2084
Scotophilus clade 2	FMNH	220887	Kenya	Meru	MH299567							0.169683	38.1942
Scotophilus clade 2	FMNH	225799	Kenya	Nakuru	MH299568	MH299610	MH299641	MH299672	MH299703	MH299734	MH299765	-0.39227	36.2112
Scotophilus clade 2	CM	102244	Kenya	Taita Taveta	EU750961							-3.41667	37.65
Scotophilus clade 2	CM	102245	Kenya	Taita Taveta	EU750962							-3.41667	37.65
Scotophilus clade 2	MCZ	60093	Kenya	Taita Taveta	EU750961							-3.39632	37.6736
Scotophilus clade 2	CM	102248	Kenya	West Pokot	EU750961							1.48333	35.4833
Scotophilus clade 3	FMNH	211513	Malawi	Rumphi	MH299569	MH299611	MH299642	MH299673	MH299704	MH299735	MH299766	-10.8788	33.4627
Scotophilus clade 3	FMNH	228967	Mozambique	Inhambane	MH299570	MH299612	MH299643	MH299674	MH299705	MH299736	MH299767	-21.671	35.188
Scotophilus clade 3	TM	47504	S Africa	Kruger NP	AY754069							-23.98	31.57
Scotophilus clade 3	FMNH	195620	S Africa	Mpumalanga	MH299571	MH299613	MH299644	MH299675	MH299706	MH299737	MH299768	-25.5628	31.8507
Scotophilus clade 4	FMNH	221038	Kenya	Kajiado	MH299572							-2.6789	37.2666
Scotophilus clade 4	FMNH	221039	Kenya	Kajiado	MH299573							-2.6789	37.2666
Scotophilus clade 4	FMNH	221040	Kenya	Kajiado	MH299574							-2.6789	37.2666
Scotophilus clade 4	FMNH	221041	Kenya	Kajiado	MH299575							-2.6789	37.2666
Scotophilus clade 4	FMNH	221043	Kenya	Kajiado	MH299576	MH299614	MH299645	MH299676	MH299707	MH299738	MH299769	-2.6789	37.2666
Scotophilus clade 4	FMNH	221042	Kenya	Makueni	MH299577	MH299615	MH299646	MH299677	MH299708	MH299739	MH299770	-2.20307	37.7137
Scotophilus clade 4	FMNH	225604	Kenya	Narok	MH299578	MH299616	MH299647	MH299678	MH299709	MH299740	MH299771	-1.54665	35.3056
Scotophilus clade 4	FMNH	225605	Kenya	Narok	MH299579							-1.40065	35.0183
Scotophilus clade 4	FMNH	225606	Kenya	Narok	MH299580							-1.40065	35.0183
Scotophilus clade 4	FMNH	225607	Kenya	Narok	MH299581							-1.39654	34.9941
Scotophilus clade 4	FMNH	225608	Kenya	Narok	MH299582							-1.39654	34.9941
Scotophilus clade 4	FMNH	225609	Kenya	Narok	MH299583							-1.39654	34.9941
Scotophilus clade 4	FMNH	225610	Kenya	Narok	MH299584							-1.54651	35.3057
Scotophilus clade 5	FMNH	228966	Mozambique	Inhambane	MH299585	MH299617	MH299648	MH299679	MH299710	MH299741	MH299772	-21.671	35.188
Scotophilus clade 5	TM	46657	S Africa	Gauteng	AY754061
Scotophilus clade 5	TM	46906	S Africa	Gauteng	AY754062
Scotophilus clade 5	none	P84	S Africa	Kranzkloof NR	AY754063							-29.77	30.83
Scotophilus clade 5	none	DSJKP11	S Africa	Kruger NP	AY754064
Scotophilus clade 5	ROM	119955	S Africa	KrugerNP	EU750995							-22.3786	31.2117
Scotophilus clade 5	none	WW2004/01	S Africa	KwaZulu Natal	AY754059
Scotophilus clade 5	TM	39624	S Africa	KwaZulu Natal	EU750997
Scotophilus clade 5	TM	39625	S Africa	Mpumalanga	EU750997
Scotophilus clade 5	CM	105747	S Africa	Transvaal	EU750999							-22.2167	29.3667
Scotophilus clade 5	CM	105748	S Africa	Transvaal	EU750993							-22.2167	29.3667
Scotophilus clade 5	CM	105749	S Africa	Transvaal	EU750992							-22.2167	29.3667
Scotophilus clade 5	CM	105750	S Africa	Transvaal	EU750998							-22.2167	29.3667
Scotophilus clade 5	TM	37668	S Africa	Transvaal	EU750994
Scotophilus clade 5	TM	37669	S Africa	Transvaal	EU750996
Scotophilus clade 5	TM	47501	Zambia	Choma	AY754066							-16.81	26.98
Scotophilus clade 6	ROM	119944	S Africa	Kruger NP	EU750949							-22.4306	31.2106
Scotophilus clade 6	TM	38149	S Africa	Kruger NP	EU750950
Scotophilus clade 6	TM	39481	S Africa	Northern	EU750951
Scotophilus clade 6	TM	39482	S Africa	Northern	EU750951
Scotophilus clade 6	TM	37675	S Africa	Transval	EU750952
Scotophilus clade 6	TM	37691	S Africa	Transval	EU750953
Scotophilus clade 6	TM	47503	Zambia		AY754075
Scotophilus clade 7	FMNH	215611	Kenya	Kisumu	MH299587	MH299618	MH299649	MH299680	MH299711	MH299742	MH299773	-0.10961	34.7459
Scotophilus clade 7	FMNH	215612	Kenya	Kisumu	MH299588	MH299619	MH299650	MH299681	MH299712	MH299743	MH299774	-0.10961	34.7459
Scotophilus clade 7	NMK	184946	Kenya	Kisumu	MH299586	MH299620	MH299651	MH299682	MH299713	MH299744	MH299775	-0.10943	34.7461
Scotophilus ejetai	CM	114043	Ethiopia	Gondar, Debre Tabor	EU750954							11.9167	37.9167
Scotophilus ejetai	TCWC	57954	Ethiopia	Oroniya	EU750956							8.36194	35.8839
Scotophilus ejetai	TCWC	57970	Ethiopia	Oroniya	EU750956							8.36194	35.8839
Scotophilus ejetai	TCWC	57956	Ethiopia	Oroniya	EU750956							8.36194	35.8839
Scotophilus ejetai	CM	DAS10293	Ethiopia	Oroniya, Dogy River Bridge	EU750956							8.36194	35.8839
Scotophilus ejetai	CM	DAS10300	Ethiopia	Oroniya, Dogy River Bridge	EU750958							8.36194	35.8839
Scotophilus ejetai	CM	DAS10309	Ethiopia	Oroniya, Dogy River Bridge	EU750956							8.36194	35.8839
Scotophilus ejetai	CM	DAS10329	Ethiopia	Oroniya, Dogy River Bridge	EU750957							8.36194	35.8839
Scotophilus ejetai	NMP	pb2554	Ethiopia		HQ694507
Scotophilus ejetai	NMP	pb2557	Ethiopia		HQ694508
Scotophilus ejetai	NMP	pb2596	Ethiopia		HQ694509
Scotophilus ejetai	CM	102256	Kenya	Taita Taveta	EU750955							-3.38333	37.7
Scotophilus ejetai	NMP	pb3065	Yemen		HQ694502
Scotophilus heathii	MVZ	176513	China	Yunnan	EU750946							21.9167	101.267
Scotophilus heathii	ROM	107786	Vietnam	Dak Lak	EU750944							12.8667	107.7
Scotophilus heathii	MVZ	186416	Vietnam	Vinh Phuc	EU750945							21.4539	105.642
Scotophilus kuhlii	none	AK 21477	Malaysia	Kedah	EU750916
Scotophilus kuhlii	USNM	458706	Philippines	Negros Oriental	EU750914							9.05	123.05
Scotophilus kuhlii	MVZ	186418	Vietnam	Tam Dao	EU750913							21.4539	105.642
Scotophilus leucogaster	NMP	pb3526	Benin		JX281748
Scotophilus leucogaster	CM	113645	Ghana	Northern	EU750940							9.41667	-0.066667
Scotophilus leucogaster	NMP	pb4782	Mauritania		JX281747
Scotophilus leucogaster	NMP	pb4787	Mauritania		JX281736
Scotophilus leucogaster	IVB	sen0382	Senegal		JX281735
Scotophilus leucogaster	IVB	sen0523	Senegal		JX281744
Scotophilus leucogaster	IVB	sen1271	Senegal		JX281745
Scotophilus leucogaster	IVB	sen1579	Senegal		JX281746
Scotophilus leucogaster	NMP	pb3599	Yemen		HQ694503
Scotophilus leucogaster	NMP	pb3676	Yemen		HQ694504
Scotophilus leucogaster	NMP	pb3677	Yemen		HQ694505
Scotophilus leucogaster	NMP	pb3725	Yemen		HQ694506
Scotophilus livingstonii	CM	113641	Ghana	Greater Accra	EU750977							5.66667	-0.2
Scotophilus livingstonii	CM	113642	Ghana	Greater Accra	EU750978							5.66667	-0.2
Scotophilus livingstonii	CM	113643	Ghana	Greater Accra	EU750979							5.66667	-0.2
Scotophilus livingstonii	CM	98051	Kenya	Kakamega	EU750984							-0.216667	34.9167
Scotophilus livingstonii	CM	98052	Kenya	Kakamega	EU750981							0.216667	34.9167
Scotophilus livingstonii	CM	98053	Kenya	Kakamega	EU750983							-0.216667	34.9167
Scotophilus livingstonii	CM	102251	Kenya	Kakamega	EU750985							0.233333	34.9
Scotophilus livingstonii	CM	102252	Kenya	Kakamega	EU750982							0.216667	34.9167
Scotophilus livingstonii	CM	102253	Kenya	Kakamega	EU750980							0.216667	34.9167
Scotophilus livingstonii	CM	102255	Kenya	Kakamega	EU750981							0.216667	34.9167
Scotophilus livingstonii	MCZ	60089	Kenya	Kakamega	EU750981							0.197826	34.9021
Scotophilus livingstonii	NMK	184974	Kenya	Kakamega	MH299589	MH299621	MH299652	MH299683	MH299714	MH299745	MH299776	0.39584	34.8831
Scotophilus livingstonii	NMK	187406	Kenya	Kakamega	MH299590	MH299622	MH299653	MH299684	MH299715	MH299746	MH299777	0.34375	34.8566
Scotophilus livingstonii	CM	98048	Kenya	Nakuru	EU750981							-0.4	36.1167
Scotophilus marovaza	FMNH	184050	Madagascar		EU750943	MH299623	MH299654	MH299685	MH299716	MH299747	MH299778	-14.9467	47.2746
Scotophilus marovaza	FMNH	184085	Madagascar		EU750942	MH299624	MH299655	MH299686	MH299717	MH299748	MH299779	-14.9467	47.2746
Scotophilus nigrita	NMP	91889	Benin		KF305856
Scotophilus nigrita	CM	9873	S Africa	Mpumalanga	KF305857
Scotophilus nigrita	IVB	sen1967	Senegal		KF305855
Scotophilus nigritellus	NMP	pb3530	Benin		JX281743
Scotophilus nigritellus	CM	113644	Ghana	Greater Accra	EU750971							5.88333	0.05
Scotophilus nigritellus	CM	113647	Ghana	Greater Accra	EU750974							5.95	0.066667
Scotophilus nigritellus	CM	113648	Ghana	Greater Accra	EU750975							5.95	0.066667
Scotophilus nigritellus	CM	113650	Ghana	Greater Accra	EU750972							5.95	0.066667
Scotophilus nigritellus	CM	113651	Ghana	Greater Accra	EU750973							5.88333	0.05
Scotophilus nigritellus	CM	113652	Ghana	Greater Accra	EU750976							5.88333	0.05
Scotophilus nigritellus	IVB	sen0524	Senegal		JX281737
Scotophilus nigritellus	IVB	sen1236	Senegal		JX281738
Scotophilus nigritellus	IVB	sen1264	Senegal		JX281739
Scotophilus nigritellus	IVB	sen1333	Senegal		JX281740
Scotophilus nigritellus	IVB	sen1685	Senegal		JX281741
Scotophilus nigritellus	IVB	sen1759	Senegal		JX281742
Scotophilus nucella	ZFMK	2003.1	Ghana	Krokosua Hills	KX010977							6.61667	2.85
Scotophilus nucella	NMP	95434	Ghana		KX010978
Scotophilus nucella	none	KHFR-C5	Ghana		KX010980
Scotophilus nucella	none	KHFR-C6	Ghana		KX010979
Scotophilus nux	CM	108032	Cameroon	Southwest	EU750935							5	8.86667
Scotophilus nux	CM	108033	Cameroon	Southwest	EU750933							5	8.86667
Scotophilus nux	CM	108034	Cameroon	Southwest	EU750934							5	8.86667
Scotophilus nux	CM	108035	Cameroon	Southwest	EU750932							5.26667	9.21667
Scotophilus nux	none	KHFR-B7	Ghana		KX010976
Scotophilus nux	CM	102257	Kenya	Kakamega	EU750936							0.233333	34.9
Scotophilus nux	CM	102258	Kenya	Kakamega	EU750939							0.233333	34.9
Scotophilus nux	CM	102259	Kenya	Kakamega	EU750937							0.233333	34.9
Scotophilus nux	MCZ	59891	Kenya	Kakamega	EU750938							0.283333	34.7833
Scotophilus robustus	FMNH	151939	Madagascar		EU750948							-22.85	44.7167
Scotophilus robustus	FMNH	166186	Madagascar		EU750947	MH299625	MH299656	MH299687	MH299718	MH299749	MH299780	-19.7067	47.835
Scotophilus tandrefana	UADBA	46923	Madagascar	Mahajanga	EU750941							-19.1409	44.8122
Scotophilus trujilloi	FMNH	216153	Kenya	Kilifi	MH299592	MH299626	MH299657	MH299688	MH299719	MH299750	MH299781	-3.30002	39.9951
Scotophilus trujilloi	FMNH	216154	Kenya	Kilifi	MH299593	MH299627	MH299658	MH299689	MH299720	MH299751	MH299782	-3.3091	40.0176
Scotophilus trujilloi	FMNH	216155	Kenya	Kilifi	MH299594							-3.30002	39.9951
Scotophilus trujilloi	FMNH	216156	Kenya	Kilifi	MH299595	MH299628	MH299659	MH299690	MH299721	MH299752	MH299783	-3.2157	39.9247
Scotophilus trujilloi	FMNH	216157	Kenya	Kilifi	MH299596							-3.2157	39.9247
Scotophilus trujilloi	FMNH	216158	Kenya	Kilifi	MH299597							-3.2157	39.9247
Scotophilus trujilloi	CM	98039	Kenya	Kwale	EU750989							-4.3	39.5833
Scotophilus trujilloi	CM	98040	Kenya	Kwale	EU750986							-4.3	39.5833
Scotophilus trujilloi	MCZ	59888	Kenya	Kwale	EU750988							-4.3	39.5833
Scotophilus trujilloi	CM	102241	Kenya	Taita Taveta	EU750987							-3.38333	37.7
Scotophilus trujilloi	CM	102242	Kenya	Taita Taveta	EU750990							-3.38333	37.7
Scotophilus trujilloi	CM	102243	Kenya	Taita Taveta	EU750991							-3.38333	37.7
Scotophilus trujilloi	FMNH	192903	Tanzania	Pemba Island	MH299598	MH299629	MH299660	MH299691	MH299722	MH299753	MH299784	-4.94176	39.7103
Myotis tricolor	FMNH	225823	Kenya	Nakuru	MH299591							-0.25157	36.0548
